# Supplementary material
Source: publisher site journal article supplement (https://www.dovepress.com/article/598962)
Supplement: Supplementary file 1 [file 598962%20Supplementary%20file%20%25281%2529.docx]

**Supplemental file 1. Study Time Periods**

**
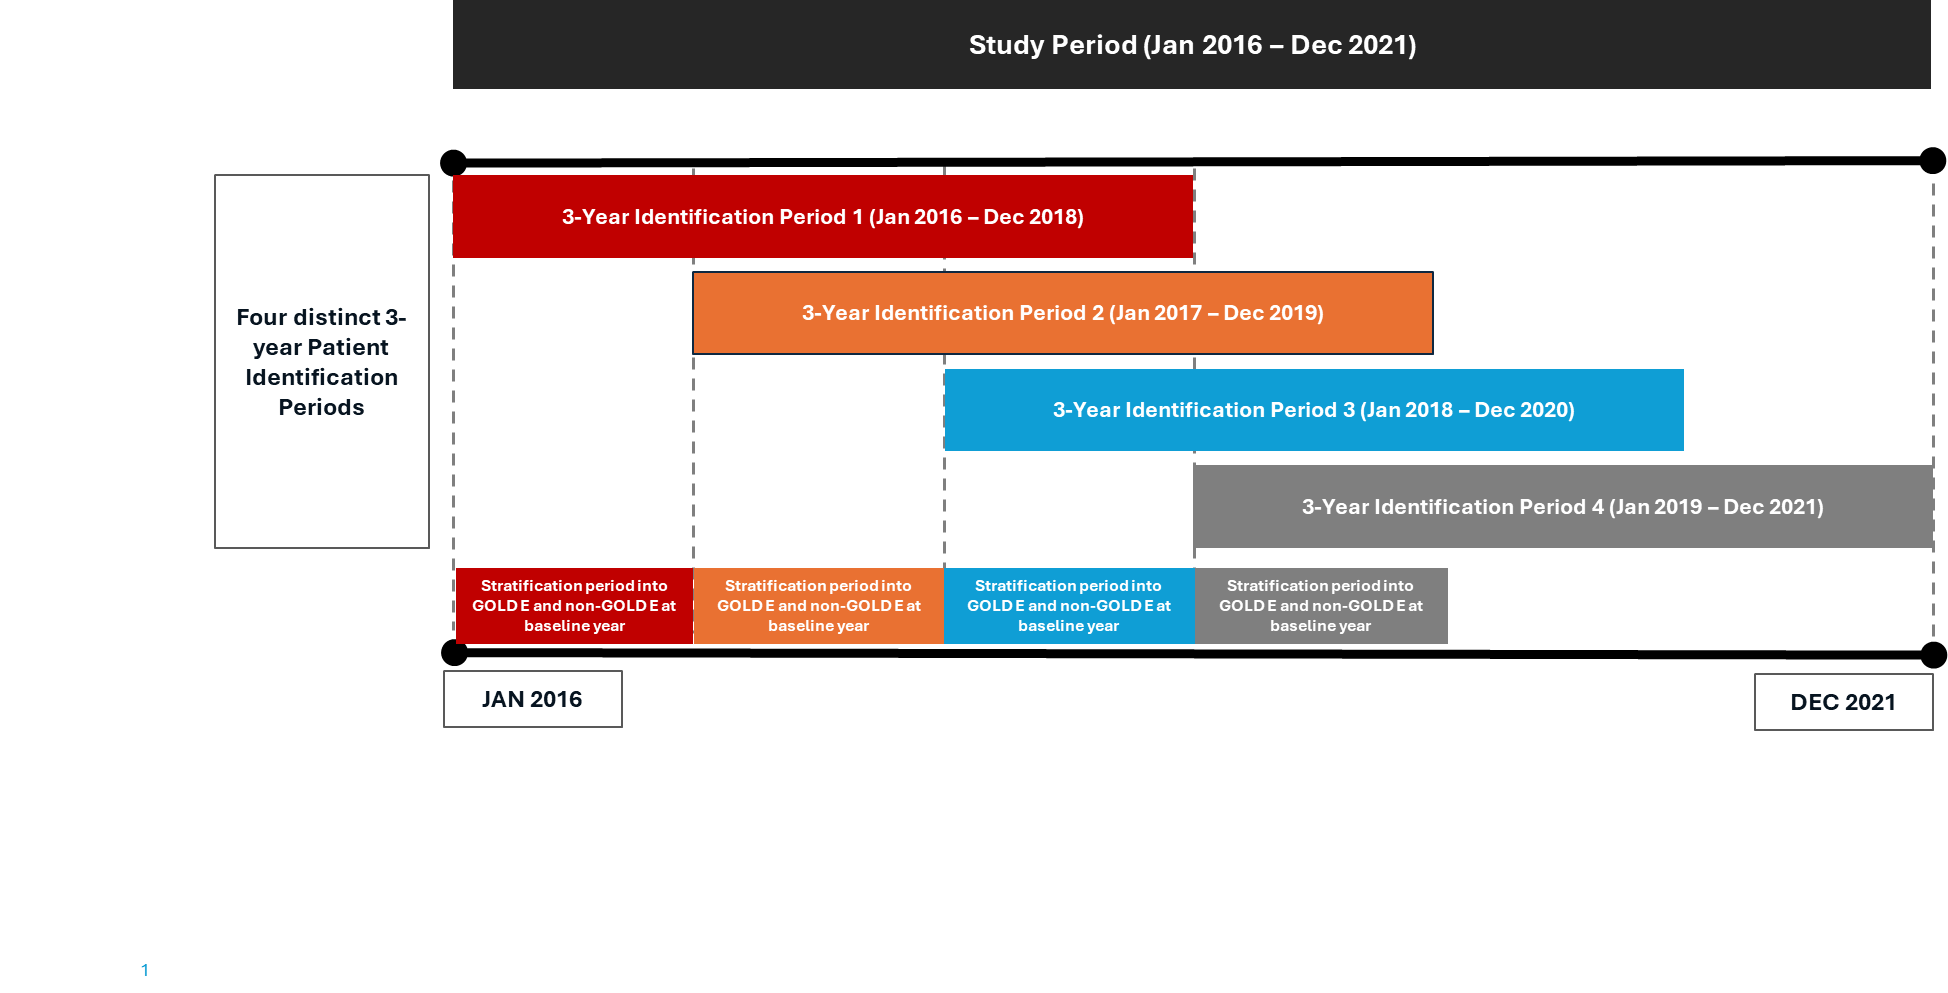
**

Abbreviation: GOLD = Global Initiative for Chronic Obstructive Lung Disease

**Supplemental file 2.** **Baseline Demographic and Clinical Characteristics, by BEC among Patients in GOLD E with at Least One BEC Lab Test Result**

| **Characteristic** | **BEC ≤ 100 cells/μL**  **(n = 5,704)** | **BEC 101-299 cells/μL**  **(n = 7,254)** | **BEC ≥ 300 cells/μL**  **(n = 9,550)** |
| --- | --- | --- | --- |
| **Age**, years, mean (SD) | 65.4 (9.1) | 65.4 (9.3) | 66.0 (9.2) |
| **Age**, years,n (%) |  |  |  |
| 40–54 | 694 (12.2%) | 926 (12.8%) | 1,148 (12.0%) |
| 55–64 | 1,938 (34.0%) | 2,414 (33.3%) | 2,897 (30.3%) |
| 65–80 | 3,072 (53.9%) | 3,914 (54.0%) | 5,505 (57.6%) |
| **Female**, n (%) | 3,544 (62.1%) | 4,360 (60.1%) | 5,143 (53.9%) |
| **Race**, n (%) |  |  |  |
| White | 4,406 (77.2%) | 5,736 (79.1%) | 7,532 (78.9%) |
| Black/African American | 965 (16.9%) | 1,108 (15.3%) | 1,443 (15.1%) |
| Othera/unknown | 320 (5.6%) | 387 (5.3%) | 533 (5.6%) |
| Asian | 13 (0.2%) | 23 (0.3%) | 42 (0.4%) |
| **Ethnicity**, n (%) |  |  |  |
| Hispanic | 141 (2.5%) | 155 (2.1%) | 299 (3.1%) |
| Non-Hispanic | 5,059 (88.7%) | 6,603 (91.0%) | 8,502 (89.0%) |
| Other/unknown ethnicity | 504 (8.8%) | 496 (6.8%) | 749 (7.8%) |
| **Geographic region**, n (%) |  |  |  |
| Northeast | 957 (16.8%) | 992 (13.7%) | 1,442 (15.1%) |
| Midwest | 2,964 (52.0%) | 4,223 (58.2%) | 5,289 (55.4%) |
| South | 1,445 (25.3%) | 1,675 (23.1%) | 2,252 (23.6%) |
| West | 338 (5.9%) | 364 (5.0%) | 567 (5.9%) |
| **Baseline year**, n (%) |  |  |  |
| 2016 | 1,544 (27.1%) | 1,898 (26.2%) | 2,827 (29.6%) |
| 2017 | 1,439 (25.2%) | 1,793 (24.7%) | 2,371 (24.8%) |
| 2018 | 1,326 (23.2%) | 1,778 (24.5%) | 2,203 (23.1%) |
| 2019 | 1,395 (24.5%) | 1,785 (24.6%) | 2,149 (22.5%) |
| **Insurance type**, n (%) |  |  |  |
| Commercial only | 1,250 (21.9%) | 1,462 (20.2%) | 1,767 (18.5%) |
| Medicare only | 2,978 (52.2%) | 4,029 (55.5%) | 5,518 (57.8%) |
| Medicaid only | 927 (16.3%) | 1,114 (15.4%) | 1,355 (14.2%) |
| Multiple known | 549 (9.6%) | 649 (8.9%) | 910 (9.5%) |
| **CCI score**, mean (SD) | 3.7 (2.6) | 4.0 (2.6) | 4.2 (2.6) |
| **COPD-related comorbidities**, evidence of, n (%) |  |  |  |
| Anemia | 2,265 (39.7%) | 3,254 (44.9%) | 4,876 (51.1%) |
| Asthma | 1,791 (31.4%) | 2,283 (31.5%) | 3,460 (36.2%) |
| Bronchiectasis | 206 (3.6%) | 254 (3.5%) | 415 (4.3%) |
| Cardiovascular-related conditions disease, any | 5,033 (88.2%) | 6,551 (90.3%) | 8,749 (91.6%) |
| Coronary artery disease | 2,538 (44.5%) | 3,682 (50.8%) | 5,235 (54.8%) |
| Heart failure | 2,325 (40.8%) | 3,320 (45.8%) | 4,815 (50.4%) |
| Hypertension | 4,815 (84.4%) | 6,308 (87.0%) | 8,468 (88.7%) |
| Myocardial infarction | 585 (10.3%) | 840 (11.6%) | 1,427 (14.9%) |
| Diabetes mellitus (all types) | 2,186 (38.3%) | 3,277 (45.2%) | 4,703 (49.2%) |
| Gastroesophageal reflux disease | 2,777 (48.7%) | 3,798 (52.4%) | 5,079 (53.2%) |
| Interstitial lung disease | 842 (14.8%) | 1,037 (14.3%) | 1,731 (18.1%) |
| Lung cancer | 549 (9.6%) | 659 (9.1%) | 767 (8.0%) |
| Metabolic syndrome | 41 (0.7%) | 68 (0.9%) | 92 (1.0%) |
| Obesity (BMI ≥ 30 kg/m2) | 2,033 (35.6%) | 3,207 (44.2%) | 4,333 (45.4%) |
| Osteoporosis | 672 (11.8%) | 858 (11.8%) | 1,081 (11.3%) |
| Psychological disturbances (anxiety/depression) | 3,338 (58.5%) | 4,401 (60.7%) | 5,892 (61.7%) |
| Pulmonary hypertension | 979 (17.2%) | 1,349 (18.6%) | 1,906 (20.0%) |
| Skeletal muscle dysfunction | 119 (2.1%) | 191 (2.6%) | 273 (2.9%) |
| Sleep disorder | 2,422 (42.5%) | 3,562 (49.1%) | 4,837 (50.6%) |

GOLD E status was defined by ≥ 2 moderate or ≥ 1 severe exacerbation during year 1 of a patient’s respective observation period; aOther race includes Native American or Alaska Native, Native Hawaiian or Pacific Islander, Middle Eastern or North African. Abbreviations: BMI = body mass index; CCI = Charlson comorbidity index; COPD = chronic obstructive pulmonary disease; GOLD = Global Initiative for Chronic Obstructive Lung Disease

**Supplemental file 3.** **Baseline Demographic and Clinical Characteristics, by BEC among Patients in GOLD E with at Least One BEC Lab Test Result and Evidence of Triple Inhaler Use**

| **Characteristic** | **BEC ≤ 100 cells/μL**  **(n = 919)** | **BEC 101-299 cells/μL**  **(n = 1,109)** | **BEC ≥ 300 cells/μL**  **(n = 1,356)** |
| --- | --- | --- | --- |
| **Age**, years, mean (SD) | 64.5 (8.2) | 64.8 (8.8) | 65.2 (8.8) |
| **Age**, years,n (%) |  |  |  |
| 40–54 | 105 (11.4%) | 125 (11.3%) | 160 (11.8%) |
| 55–64 | 376 (40.9%) | 437 (39.4%) | 492 (36.3%) |
| 65–80 | 438 (47.7%) | 547 (49.3%) | 704 (51.9%) |
| **Female**, n (%) | 594 (64.6%) | 662 (59.7%) | 765 (56.4%) |
| **Race**, n (%) |  |  |  |
| White | 720 (78.3%) | 878 (79.2%) | 1,095 (80.8%) |
| Black/African American | 130 (14.1%) | 165 (14.9%) | 184 (13.6%) |
| Othera/unknown | < 75 | 61 (5.5%) | < 75 |
| Asian | < 5 | 5 (0.5%) | < 5 |
| **Ethnicity**, n (%) |  |  |  |
| Hispanic | 23 (2.5%) | 28 (2.5%) | 40 (2.9%) |
| Non-Hispanic | 800 (87.1%) | 1,008 (90.9%) | 1,208 (89.1%) |
| Other/unknown ethnicity | 96 (10.4%) | 73 (6.6%) | 108 (8.0%) |
| **Geographic region**, n (%) |  |  |  |
| Northeast | 178 (19.4%) | 199 (17.9%) | 238 (17.6%) |
| Midwest | 444 (48.3%) | 629 (56.7%) | 711 (52.4%) |
| South | 233 (25.4%) | 228 (20.6%) | 307 (22.6%) |
| West | 64 (7.0%) | 53 (4.8%) | 100 (7.4%) |
| **Baseline year**, n (%) |  |  |  |
| 2016 | 226 (24.6%) | 237 (21.4%) | 365 (26.9%) |
| 2017 | 199 (21.7%) | 240 (21.6%) | 283 (20.9%) |
| 2018 | 220 (23.9%) | 273 (24.6%) | 332 (24.5%) |
| 2019 | 274 (29.8%) | 359 (32.4%) | 376 (27.7%) |
| **Insurance type**, n (%) |  |  |  |
| Commercial only | 221 (24.0%) | 229 (20.6%) | 279 (20.6%) |
| Medicare only | 456 (49.6%) | 594 (53.6%) | 781 (57.6%) |
| Medicaid only | 180 (19.6%) | 216 (19.5%) | 233 (17.2%) |
| Multiple known | 62 (6.7%) | 70 (6.3%) | 63 (4.6%) |
| **CCI score**, mean (SD) | 3.3 (2.4) | 3.6 (2.5) | 3.7 (2.5) |
| **COPD-related comorbidities**, evidence of, n (%) |  |  |  |
| Anemia | 293 (31.9%) | 424 (38.2%) | 571 (42.1%) |
| Asthma | 296 (32.2%) | 352 (31.7%) | 547 (40.3%) |
| Bronchiectasis | 38 (4.1%) | 55 (5.0%) | 67 (4.9%) |
| Cardiovascular-related conditions, any | 787 (85.6%) | 975 (87.9%) | 1,213 (89.5%) |
| Coronary artery disease | 381 (41.5%) | 527 (47.5%) | 659 (48.6%) |
| Heart failure | 347 (37.8%) | 470 (42.4%) | 612 (45.1%) |
| Hypertension | 726 (79.0%) | 930 (83.9%) | 1,164 (85.8%) |
| Myocardial infarction | 83 (9.0%) | 112 (10.1%) | 162 (11.9%) |
| Diabetes mellitus (all types) | 305 (33.2%) | 428 (38.6%) | 589 (43.4%) |
| Gastroesophageal reflux disease | 428 (46.6%) | 575 (51.8%) | 730 (53.8%) |
| Interstitial lung disease | 110 (12.0%) | 154 (13.9%) | 220 (16.2%) |
| Lung cancer | 87 (9.5%) | 101 (9.1%) | 119 (8.8%) |
| Metabolic syndrome | 9 (1.0%) | 7 (0.6%) | 8 (0.6%) |
| Obesity (BMI ≥ 30 kg/m2) | 315 (34.3%) | 459 (41.4%) | 585 (43.1%) |
| Osteoporosis | 127 (13.8%) | 142 (12.8%) | 172 (12.7%) |
| Psychological disturbances (anxiety/depression) | 556 (60.5%) | 675 (60.9%) | 852 (62.8%) |
| Pulmonary hypertension | 171 (18.6%) | 208 (18.8%) | 282 (20.8%) |
| Skeletal muscle dysfunction | 13 (1.4%) | 26 (2.3%) | 36 (2.7%) |
| Sleep disorder | 398 (43.3%) | 554 (50.0%) | 693 (51.1%) |

GOLD E status was defined by ≥ 2 moderate or ≥ 1 severe exacerbation during year 1 of a patient’s respective observation period; aOther race includes Native American or Alaska Native, Native Hawaiian or Pacific Islander, Middle Eastern or North African. Abbreviations: BMI = body mass index; CCI = Charlson comorbidity index; COPD = chronic obstructive pulmonary disease; GOLD = Global Initiative for Chronic Obstructive Lung Disease

**Supplemental file 4. Baseline Demographic and Clinical Characteristics among Patients in GOLD E with Known Smoking Status**

| **Characteristic** | **Current Smoker (n = 10,655)** | **Former Smoker (n = 12,217)** | **Never Smoker**  **(n = 2,470)** |
| --- | --- | --- | --- |
| **Age**, years,n (%) |  |  |  |
| 40–54 | 2,082 (19.5%) | 939 (7.7%) | 298 (12.1%) |
| 55–64 | 4,452 (41.8%) | 3,367 (27.6%) | 672 (27.2%) |
| 65–80 | 4,121 (38.7%) | 7,911 (64.8%) | 1,500 (60.7%) |
| **Female**, n (%) | 6,494 (60.9%) | 6,729 (55.1%) | 1,643 (66.5%) |
| **Race**, n (%) |  |  |  |
| White | 8,586 (80.6%) | 10,008 (81.9%) | 1,771 (71.7%) |
| Black/African American | 1,600 (15.0%) | 1,612 (13.2%) | 505 (20.4%) |
| Othera/unknown | 446 (4.2%) | 562 (4.6%) | 166 (6.7%) |
| Asian | 23 (0.2%) | 35 (0.3%) | 28 (1.1%) |
| **Ethnicity**, n (%) |  |  |  |
| Hispanic | 220 (2.1%) | 324 (2.7%) | 94 (3.8%) |
| Non-Hispanic | 9,638 (90.5%) | 10,943 (89.6%) | 2,170 (87.9%) |
| Other/unknown ethnicity | 797 (7.5%) | 950 (7.8%) | 206 (8.3%) |
| **Geographic region**, n (%) |  |  |  |
| Northeast | 1,775 (16.7%) | 2,201 (18.0%) | 330 (13.4%) |
| Midwest | 5,582 (52.4%) | 6,532 (53.5%) | 1,219 (49.4%) |
| South | 2,626 (24.6%) | 2,721 (22.3%) | 795 (32.2%) |
| West | 672 (6.3%) | 763 (6.2%) | 126 (5.1%) |
| **Baseline year**, n (%) |  |  |  |
| 2016 | 2,792 (26.2%) | 3,301 (27.0%) | 685 (27.7%) |
| 2017 | 2,589 (24.3%) | 3,205 (26.2%) | 638 (25.8%) |
| 2018 | 2,534 (23.8%) | 2,843 (23.3%) | 548 (22.2%) |
| 2019 | 2,740 (25.7%) | 2,868 (23.5%) | 599 (24.3%) |
| **Insurance type**, n (%) |  |  |  |
| Commercial only | 2,506 (23.5%) | 2,466 (20.2%) | 461 (18.7%) |
| Medicare only | 4,637 (43.5%) | 7,224 (59.1%) | 1,397 (56.6%) |
| Medicaid only | 2,469 (23.2%) | 1,350 (11.1%) | 309 (12.5%) |
| Multiple known | 1,043 (9.8%) | 1,177 (9.6%) | 303 (12.3%) |
| **CCI score**, mean (SD) | 3.5 (2.5) | 4.0 (2.7) | 4.4 (2.6) |
| **COPD-related comorbidities**, evidence of, n (%) |  |  |  |
| Anemia | 3,808 (35.7%) | 5,567 (45.6%) | 1,335 (54.0%) |
| Asthma | 3,366 (31.6%) | 3,880 (31.8%) | 1,248 (50.5%) |
| Bronchiectasis | 231 (2.2%) | 573 (4.7%) | 167 (6.8%) |
| Cardiovascular-related conditions, any | 9,076 (85.2%) | 11,041 (90.4%) | 2,302 (93.2%) |
| Coronary artery disease | 4,677 (43.9%) | 6,314 (51.7%) | 1,316 (53.3%) |
| Heart failure | 3,856 (36.2%) | 5,671 (46.4%) | 1,353 (54.8%) |
| Hypertension | 8,681 (81.5%) | 10,610 (86.8%) | 2,244 (90.9%) |
| Myocardial infarction | 1,171 (11.0%) | 1,430 (11.7%) | 304 (12.3%) |
| Diabetes mellitus (all types) | 4,060 (38.1%) | 5,448 (44.6%) | 1,389 (56.2%) |
| Gastroesophageal reflux disease | 5,152 (48.4%) | 6,285 (51.4%) | 1,489 (60.3%) |
| Interstitial lung disease | 1,257 (11.8%) | 2,025 (16.6%) | 495 (20.0%) |
| Lung cancer | 770 (7.2%) | 1,281 (10.5%) | 94 (3.8%) |
| Metabolic syndrome | 68 (0.6%) | 108 (0.9%) | 35 (1.4%) |
| Obesity (BMI ≥ 30 kg/m2) | 3,834 (36.0%) | 5,136 (42.0%) | 1,470 (59.5%) |
| Osteoporosis | 1,017 (9.5%) | 1,562 (12.8%) | 357 (14.5%) |
| Psychological disturbances (anxiety/depression) | 6,726 (63.1%) | 6,828 (55.9%) | 1,475 (59.7%) |
| Pulmonary hypertension | 1,323 (12.4%) | 2,475 (20.3%) | 580 (23.5%) |
| Skeletal muscle dysfunction | 220 (2.1%) | 308 (2.5%) | 100 (4.0%) |
| Sleep disorder | 4,581 (43.0%) | 5,881 (48.1%) | 1,431 (57.9%) |

GOLD E status was defined by ≥ 2 moderate or ≥ 1 severe exacerbation during year 1 of a patient’s respective observation period; aOther race includes Native American or Alaska Native, Native Hawaiian or Pacific Islander, Middle Eastern or North African. Abbreviations: BMI = body mass index; CCI = Charlson comorbidity index; COPD = chronic obstructive pulmonary disease; GOLD = Global Initiative for Chronic Obstructive Lung Disease
